1           **Microbial community-based production of single cell protein from**  
2           **soybean-processing wastewater of variable chemical composition**

3

4       *Ramanujam Srinivasan Vethathirri*<sup>1,2</sup>, *Ezequiel Santillan*<sup>1\*</sup>, *Sara Swa Thi*<sup>1</sup>, *Hui Yi Hoon*<sup>1</sup>, and  
5                                               *Stefan Wuertz*<sup>1,2\*</sup>

6

7

8

9       <sup>1</sup>Singapore Centre for Environmental Life Sciences Engineering, Nanyang Technological  
10       University, Singapore, 637551, Singapore.

11       <sup>2</sup>School of Civil and Environmental Engineering, Nanyang Technological University,  
12       Singapore, 639798, Singapore.

13

14

15

16       \*Correspondence to:

17       Ezequiel Santillan ([esantillan@ntu.edu.sg](mailto:esantillan@ntu.edu.sg)) and Stefan Wuertz ([swuertz@ntu.edu.sg](mailto:swuertz@ntu.edu.sg))

18 **Abstract**

19 The use of food-processing wastewaters to produce microbial biomass-derived single cell  
20 protein (SCP) is a sustainable way to meet the global food demand. Yet, despite the potential  
21 benefits of lower costs and greater resource recovery compared to pure cultures,  
22 bioconversion processes relying on microbial community-based approaches to SCP  
23 production have received scarce attention. Here, we evaluated SCP production from soybean-  
24 processing wastewaters under controlled reactor conditions using the existent microbial  
25 communities in these wastewaters. Six sequencing batch reactors of 4.5-L working volume  
26 were operated at 30 °C for 34 d in cycles consisting of 3-h anaerobic and 9-h aerobic phases.  
27 Four reactors received no microbial inoculum and the remaining two were amended with a  
28 1.5 L of mixed culture from a prior microbial community-based SCP production. Microbial  
29 characterization was done via 16S rRNA gene metabarcoding. Influent wastewater batches  
30 had variable chemical characteristics but a similar microbial composition. Reactors produced  
31 more SCP when fed with wastewaters of higher soluble total Kjeldahl nitrogen (sTKN)  
32 content and a lower carbon-to-nitrogen ratio (sCOD:sTKN). The biomass protein yield  
33 ranged from 0.24 to 3.13 g protein/g sTKN, with a maximum protein content of 50%. An  
34 average of 92% of sCOD and 73% of sTN removal was achieved. Distinct microbial  
35 communities were enriched in all six bioreactors after 34 d, where the prevailing genera  
36 included *Azospirillum*, *Rhodobacter*, *Lactococcus*, *Novosphingobium*, and  
37 *Acidipropionibacterium*. In contrast, the microbial community of influent wastewaters was  
38 dominated by *Lactococcus* and *Weissella*. We showed that constituents in soybean  
39 wastewater can be converted to SCP through microbial community-based growth processes  
40 and demonstrated the effect of variable influent wastewater composition on SCP production.

41 **Keywords:** carbon-to-nitrogen ratio; essential amino acid; probiotic; single cell protein;  
42 animal feed; circular economy

## 43 **1. Introduction**

44           Microbial protein or single cell protein (SCP) consists of dried microorganisms with a  
45 high protein content along with fats, carbohydrates, vitamins, and minerals (Suman et al.,  
46 2015). It represents a promising alternative to fishmeal as a protein source in aquaculture,  
47 especially when raising sea bass, Atlantic salmon, rainbow trout, and whiteleg shrimp (Jones  
48 et al., 2020). Producing SCP from wastewaters would help alleviate the environmental impact  
49 caused by both traditional agricultural food production (Owsianiak et al., 2022) and  
50 wastewater treatment and disposal (Durkin et al., 2022; Spiller et al., 2020). SCP also has the  
51 potential to outperform staple crops in terms of protein yield per land area (Leger et al.,  
52 2021). According to estimates, by 2050, the adoption of microbial protein could reduce the  
53 required cropland area, global nitrogen losses from croplands, and agricultural greenhouse  
54 gas emissions worldwide by 6%, 8%, and 7%, respectively (Pikaar et al., 2018).

55           Microbial biomass may be produced by growing pure cultures (axenic SCP) or a  
56 mixture of strains or taxa (microbial community-based SCP), provided they can use  
57 wastewater as a source of carbon, energy and reducing power. A microbial community-based  
58 process has potential advantages over axenic culturing, such as a higher protein content due  
59 to synergistic interactions between different SCP-producing groups and utilization of various  
60 carbon and nitrogen sources in the substrate (Alloul et al., 2021a), process stability in terms  
61 of resistance and resilience to disturbances (Santillan et al., 2020b; Santillan et al., 2019a;  
62 Santillan & Wuertz, 2022), and the accumulation of intracellular components (Janarthanan et  
63 al., 2016). Further, this approach takes advantage of the microbial taxa already present in the  
64 wastewater by providing suitable growth conditions (Vethathirri et al., 2021). Indeed, the  
65 most suitable microbial organisms could be enriched within a mixed community to perform  
66 the targeted biotechnological process (Verstraete et al., 2022). Mixed microbial communities  
67 grown on wastewaters can meet the minimum dietary requirement of aquaculture animals

68 (Vethathirri et al., 2021). However, information on the existent microbial communities in  
69 influent raw wastewaters and the enriched communities in such SCP production systems is  
70 scarce. Three types of bacterial consortia are used in microbial community-based systems,  
71 namely, aerobic heterotrophic bacteria, microalgae and aerobic heterotrophic bacteria, and  
72 purple phototrophic bacteria (Spiller et al., 2020; Vethathirri et al., 2021). Only the latter,  
73 which use light as energy source for the assimilation of organics and nutrients, have been  
74 directly enriched from wastewaters for SCP production (Hülßen et al., 2022). To our  
75 knowledge, the present study is the first to grow SCP based on aerobic heterotrophic bacteria  
76 present in the wastewater.

77 Compared to other wastewaters, food-processing wastewaters are of interest for  
78 microbial protein production due to their much lower content in pathogens, heavy metals, and  
79 other toxic contaminants. Chemically characterizing such wastewaters helps to assess their  
80 suitability for microbial biomass formation, with bioavailability of carbon- and nitrogen-  
81 containing organic compounds a key parameter (Vethathirri et al., 2021). In general, the  
82 chemical characteristics of food-processing wastewaters, including their carbon-to-nitrogen  
83 ratio (C:N), vary widely with production processes (Nayyar et al., 2021), making microbial  
84 community-based SCP production a challenging task. For it to be cost-effective and  
85 sustainable, the addition of external nutrients to maintain a suitable C:N should be avoided.  
86 Consequently, it is necessary to investigate how varying C:N affects both microbial growth  
87 and protein yield.

88 The overall aim of this study was to assess the production of microbial community-  
89 based SCP over time using different batches of the same source of soybean-processing  
90 wastewater. The objectives were to (1) microbially characterize the wastewater and  
91 community-based biomass; (2) determine suitable chemical characteristics in the feed to  
92 achieve a higher biomass yield and protein content; (3) characterize the amino acid content in

93 the microbial protein produced; and (4) evaluate the effect of inoculation with a seed  
94 consortium on SCP production rate and yield. We showed that through microbial community-  
95 based growth, soybean-processing wastewaters can be converted directly into microbially  
96 derived protein that meets the amino acid requirements of aquaculture feed.

## 97 **2. Materials and methods**

### 98 *2.1 Experimental design*

99 Six 4.5-L bioreactors were operated as sequencing batch reactors on continuous 12-h  
100 cycles with intermittent aeration for 34 d, receiving wastewater from a soybean processing  
101 company in Singapore. Over the course of three months, nine 20-L carboys of wastewater  
102 from soybean soaking were collected at seven different occasions. Initially, two reactors were  
103 operated to test whether biomass could be enriched directly from soybean processing  
104 wastewater. Afterwards, a set of four reactors was operated to see if biomass could be again  
105 enriched directly from different batches of soybean processing wastewaters, and if having a  
106 starting inoculum would yield better SCP production than starting without it, receiving the  
107 same wastewater feed. Hence, four SBRs were operated without a starting inoculum: F<sub>1-2</sub>, F<sub>3</sub>,  
108 F<sub>4-5</sub>, and F<sub>6-7</sub>, whereas reactors IF<sub>4-5</sub> and IF<sub>6-7</sub> were started using 1.5-L inoculum from F<sub>3</sub> after  
109 43 days. Subscript numbers indicate the wastewater batch used as feed. Reactors IF<sub>4-5</sub> and  
110 IF<sub>6-7</sub> were comparable to reactors F<sub>4-5</sub> and F<sub>6-7</sub>, respectively, which were fed with identical  
111 batches of wastewater but did not have a starting sludge inoculum.

### 112 *2.2 Operational parameters and bioreactor arrangement*

113 The reactor temperature was maintained at 30°C and sludge was continuously mixed  
114 at 375 rpm. Feeding phase occurred during the initial 5-10 min of a cycle, followed by  
115 alternating 180 min anoxic/anaerobic and 540 min aerobic phases. Cycles finished once  
116 soluble chemical oxygen demand (sCOD) of the mixed liquor was measured to be less than  
117 400 mg/L, after which time the biomass was left to settle for 60 min and 1.85 L of

118 supernatant was discarded. Thereafter, the reactor was filled with the same volume of  
119 soybean wastewater, starting a new cycle. This feeding scheme resulted in the following  
120 average hydraulic residence time (HRT) values for the six bioreactors operated: 9.7 d (F<sub>1-2</sub>),  
121 14.6 d (F<sub>3</sub>), 8.4 d (F<sub>4-5</sub>), 8.4 d (IF<sub>4-5</sub>), 8.4 d (F<sub>6-7</sub>) and 8.4 d (IF<sub>6-7</sub>) (details in supplementary  
122 information). The pH ranged from 6.0 to 8.5 and the dissolved oxygen (DO) concentration  
123 was controlled between 0.2 and 0.5 mg/L during the aerobic phase. Each of the SBRs  
124 employed in this study was equipped with a magnetic stir plate to ensure mixed liquor  
125 homogeneity, a pair of EasySense pH and DO probes with their corresponding transmitters  
126 (Mettler Toledo), a dedicated air pump, a dedicated feed pump, a solenoid valve for  
127 supernatant discharge, and a surrounding water jacket connected to a re-circulating water  
128 heater. The different portions of the cycle were controlled by a computer software  
129 specifically designed for these reactors (VentureMerger, Singapore). Water chemical  
130 analyses were done as described in Santillan et al. (2021) (details in SI).

### 131 *2.3 Biomass protein analysis*

132 The protein content of the biomass was determined by quantifying amino acids using  
133 high-performance liquid chromatography (HPLC). First, 0.05 g of freeze-dried biomass was  
134 mixed with 5 mL of 6 M HCl and flushed with nitrogen gas for about 50 s. Then the samples  
135 was digested using heating block at 110°C for 22 h followed by filtration with a 0.22 µm  
136 membrane filter after cooling down. The solution was vacuum evaporated to dryness at 38 °C  
137 and 25 Pa in a rotary evaporator and re-dissolved in a volumetric flask with 5 mL of 0.1 M  
138 HCl. It was centrifuged for 40 min at 10,000 g and 4°C. The supernatant was filtered using a  
139 0.22 µm membrane filter and the filtrate maintained at 4°C until derivatization (Chen et al.,  
140 2019). Pre-column derivatization was used with o-phthalaldehyde and 9-  
141 fluorenylmethoxycarbonyl (FMOC-Cl) via an autosampler (SIL -30 AC Autosampler). Seven  
142 and a half microliter of sample or standard was mixed with 45 µL of mercaptopropionic acid

143 and 22  $\mu$ L of OPA for 1 min in online derivatization. After mixing 8  $\mu$ L of FMOC for 2 min,  
144 5  $\mu$ L of 0.1 M HCl was added. The reaction mixture was injected into an HPLC (Prominence  
145 UFLC, Shimadzu, Japan) equipped with a UV diode array detector (DAD, SPD-M20A), and  
146 detected at a wavelength of 338 nm for primary and 266 nm for secondary amino acids after  
147 passage through a Shimadzu Shim-pack Scepter C18 column (3 $\mu$ m, 3.0 X 150 mm). The flow  
148 rate was adjusted to 0.8 mL/min and the column temperature was set to 40°C. Gradient  
149 programs were applied for HPLC analysis.

#### 150 *2.4 Microbial analysis*

151 Each soybean wastewater feed batch was subsampled once for microbial analysis and  
152 sludge samples were collected thrice a week from each reactor. A 50-mL feed sample was  
153 centrifuged at 10000 rpm for 3 min and 45 mL of supernatant discarded resulting in a tenfold  
154 increase in biomass concentration. Aliquots of 2 mL of concentrated wastewater and 2 mL of  
155 sludge samples were stored in cryogenic vials at -80°C for DNA extraction as previously  
156 described (Santillan et al., 2019b). Bacterial 16S rRNA amplicon sequencing was done in two  
157 steps as described in Santillan et al. (2020b). Primer set 341f/785r targeted the V3-V4  
158 variable regions of the 16S rRNA gene (Thijs et al., 2017). The libraries were sequenced on  
159 an Illumina MiSeq platform (v.3) with 20% PhiX spike-in and at a read-length of 300 bp  
160 paired-end. Sequenced sample libraries were processed following the DADA2 bioinformatics  
161 pipeline (Callahan et al., 2016). DADA2 allows inference of exact amplicon sequence  
162 variants (ASVs) providing several benefits over traditional OTU clustering methods  
163 (Callahan et al., 2017). Illumina sequencing adaptors and PCR primers were trimmed prior to  
164 quality filtering. Sequences were truncated after 280 and 255 nucleotides for forward and  
165 reverse reads, respectively, length at which average quality dropped below a Phred score of  
166 20. After truncation, reads with expected error rates higher than 3 and 5 for forward and  
167 reverse reads were removed. After filtering, error rate learning, ASV inference and denoising,

168 reads were merged with a minimum overlap of 20 bp. Chimeric sequences (0.77% on  
169 average) were identified and removed. For a total of 81 samples, 47034 reads were kept on  
170 average per sample after processing, representing 52% of the average input reads. Taxonomy  
171 was assigned using the SILVA database (v.138) (Glockner et al., 2017). The adequacy of  
172 sequencing depth after reads processing was corroborated with rarefaction curves at the ASV  
173 level (Figure S1).

#### 174 *2.5 Fluorescence in situ hybridization*

175 Microbial characterization was further supported by fluorescence in situ hybridization  
176 (FISH) using probes for the domain bacteria and selected core SCP taxa. Sludge samples  
177 were amended with 4% paraformaldehyde and placed on ice for 2-3 h. The fixed samples  
178 were washed with 1× phosphate-buffered saline (PBS) solution and stored in a mixture of  
179 1×PBS and ethanol (1:1) at -20 °C until use. The cells were allowed to dry on microscopic  
180 slides and dehydrated in an ethanol series of 50, 80 and 96% for 3 min each. Hybridization  
181 buffer (0.9 M NaCl, 20 Mm Tris-HCl, 35% formamide, 0.01% sodium dodecyl sulfate) and  
182 probes were added to detect microorganisms of interest. Eubmix (Eub338, Eub 338II, Eub  
183 338III) targets most bacteria (Daims et al., 1999) and AZOI 655 probe targets species  
184 belonging to *Azospirillum* (Stoffels et al., 2001). After hybridization, the slides were washed  
185 with warm buffer for 10 min (0.9 M NaCl, 20 Mm Tris-HCl, 5 mM EDTA, 0.01% sodium  
186 dodecyl sulfate) and rinsed thoroughly with cold water. FISH images were acquired using a  
187 LSM780 confocal laser scanning microscope. The Zen software was used for image  
188 processing and graphical analysis (Carl Zeiss, German).

### 189 **3. Results and Discussion**

#### 190 *3.1 Microbial composition of influent wastewaters*

191 Microbial characterization of the influent food-processing wastewaters helps to  
192 identify microorganisms that could potentially drive the microbial community-based SCP



193 production (Vethathirri et al., 2021). The different batches of soybean-processing  
194 wastewaters used in this study had a similar microbial community, which was dominated by  
195 the phylum *Firmicutes* at a relative abundance of  $96 \pm 6.7\%$  (Figure 1a). At a finer taxonomic  
196 level, *Lactococcus* and *Weissella* were the most abundant genera at relative abundances of  $45$   
197  $\pm 16.6\%$  and  $36 \pm 16.6\%$ , respectively (Figure 1b). Strains of *Lactococcus* are used in cheese  
198 making and can produce vitamins such as B2 and K2 (Song et al., 2017), and *Weissella* has  
199 shown potential as a probiotic in food and pharmaceutical industries (Teixeira et al., 2021). In  
200 addition, *Leuconostoc* was identified in all soybean wastewaters at a relative abundance of  
201 4.1–15.1% except for the sixth wastewater batch, which at 14 mg/L also had the lowest  
202 average sTKN content. The most abundant ASV at the species level was *Leuconostoc palmae*  
203 (up to 6.5% relative abundance). Several strains of *Leuconostoc* are of economic value due to  
204 their widespread application in dairy technology (Hemme & Foucaud-Scheunemann, 2004).  
205 Besides these three genera, *Streptococcus* was also found in all wastewater batches at a  
206 relative abundance of up to 16%. *Streptococcus thermophilus* is important in dairy industries  
207 that produce milk, cheese, and yogurt (Mora et al., 2002). *Lactobacillus*, *Enterobacter*,  
208 *Aeromonas*, and *Acinetobacter* occurred less frequently in influent wastewaters at a relative  
209 abundance greater than 1% included (Figure 1b). *Lactobacillus* can be used as a probiotic to  
210 cure several ailments, especially chronic liver diseases (Jeong et al., 2022), and strains of  
211 *Lactobacillus rhamnosus*, *Lactobacillus casei* and *Lactobacillus plantarum* may be explored  
212 as a source of natural antioxidants (Shori et al., 2022). Certain species of free-living  
213 *Enterobacter*, specifically *Enterobacter cloacae*, were found to be involved in symbiotic  
214 nitrogen fixation in plants such as wheat (Ji et al., 2020). Studying the microbial communities  
215 of influent wastewaters can also help spot potentially pathogenic *Aeromonas* strains  
216 associated with disease in humans and aquatic animals (Fernandez-Bravo & Figueras, 2020).  
217 In conclusion, the microbial characterization of influent wastewaters revealed low variability

218 across batches and identified several taxa suitable for the potential production of both SCP  
219 and other valuable compounds.

### 220 *3.2 Wastewaters with a lower sCOD:sTKN (C:N) and higher sTKN produced more SCP*

221 While the microbial communities of different batches of soybean-processing  
222 wastewaters were similar at the phylum level, the chemical composition was variable,  
223 particularly the nitrogen content. The sTKN and sCOD:sTKN values were in the range of 13  
224 -110 mg/L and 74 - 187, respectively, for the seven batches of wastewaters collected at  
225 different time points from the same soybean processing source (Table 1). According to the  
226 wastewater provider, this variability could be due to changes in the quantity of soybeans  
227 soaked in water for washing and the source of the soybeans being processed. In general, the  
228 darker the color of soybean-processing wastewater, the higher the sTKN level and the lower  
229 the sCOD:sTKN value, increasing its potential for SCP production (Vethathirri et al., 2021).  
230 To account for the variable N content in different batches of wastewater used in this study,  
231 we characterized them as either low (L) for sTKN = 13 - 61 mg/L or high (H) for sTKN = 62  
232 - 110 mg/L) (see Tables 1 and 2).

233 The biomass in the six community-based SCP reactors was tracked as total suspended  
234 solids (TSS) concentration for 34 days (Figure 2a). The initial average biomass concentration  
235 of the four reactors that started without inoculum was the same as the average TSS of the  
236 soybean wastewater batches (233 mg/L), whereas the other two reactors that received  
237 inoculum had an initial average TSS of 575 mg/L. Despite having started without inoculum,  
238 reactor F<sub>3</sub> showed a higher TSS concentration of 1967 mg/L on d34 than its offspring  
239 reactors IF<sub>4-5</sub> and IF<sub>6-7</sub>, which started with an inoculum produced from F<sub>3</sub>. We attribute this  
240 difference to the favorable chemical characteristics of the wastewater batch used for F<sub>3</sub>, which  
241 had high sTKN levels and a low sCOD:sTKN compared to other feeds (Table 2). On the  
242 other hand, the lowest TSS value on d34 was 227 mg/L, observed in reactor F<sub>1-2</sub>, which was

243 initiated without inoculum. Further, this was also the only reactor that showed a declining  
244 trend in cell growth in the second half of the experiment (Figure 2a). This was due to the low  
245 sTKN level in the wastewater batch (31 mg/L) that was used after d24, which then affected  
246 the overall biomass production rate and yield (Table 2) of reactor F<sub>1-2</sub>. Although this batch  
247 had the lowest sCOD:sTKN of all the batches (Table 2), it did not support cell growth with  
248 the feeding regime used in this study. Hence, both a lower sCOD:sTKN and a sufficiently  
249 high sTKN concentration are needed to sustain community-based microbial biomass  
250 production.

251 Amino acid analysis by HPLC was used to accurately determine protein levels in the  
252 dry microbial biomass (FAO, 2003; Vethathirri et al., 2021). The amount of protein in the  
253 biomass followed the pattern of TSS production (Figure 2a), with increasing or decreasing  
254 trends depending on the wastewater batch used in each bioreactor at a particular time of the  
255 study. An increase in biomass protein content was observed in reactor F<sub>1-2</sub> from d1 to d23, in  
256 F<sub>3</sub> from d1 to d34, in F<sub>6-7</sub> from d22 to d34, and in IF<sub>6-7</sub> from d22 to d34 due to the usage of  
257 feed wastewaters with a lower sCOD:sTKN and higher sTKN content (62 - 110 mg/L)  
258 (Figure 2a). A similar pattern was observed with other types of mixed-culture SCP biomass  
259 produced from photosynthetic bacteria using artificial sugar wastewaters of lower COD:TN  
260 (5 to 50) (Cao et al., 2021). On the other hand, biomass protein content was decreasing or  
261 stayed constant in reactors F<sub>1-2</sub> (d24 to d34), F<sub>4-5</sub> (d1 to d34), IF<sub>4-5</sub> (d1 to d34), F<sub>6-7</sub> (d1 to  
262 d21), and IF<sub>6-7</sub> (d1 to d21) due to the usage of wastewaters with a higher sCOD:sTKN and  
263 lower sTKN content (13 - 61 mg/L) (Figure 2a) in our study. Hence, when reactors received  
264 wastewater with a lower sCOD:sTKN and a higher sTKN content, they produced  
265 significantly more biomass and protein (two-tailed Welch's t-tests,  $p < 0.0001$ ) than when  
266 they were fed with wastewater that had a high sCOD:sTKN and low sTKN content (Figure  
267 2b).

268           The protein content in the microbial biomass is important for fish feed applications  
269 (Azim et al., 2008; Webster & Lim, 2002). Higher protein contents of 49.9, 49.5 and 48.7%  
270 as dry biomass were observed in reactors IF<sub>4-5</sub>, F<sub>1-2</sub>, and F<sub>4-5</sub>, respectively (Figure S2),  
271 regardless of the presence or absence of an initial inoculum. Similar protein percentages were  
272 observed in aerobic heterotrophic biomass produced from different food processing  
273 wastewaters (Muys et al., 2020). However, they were lower than reported values for other  
274 types of SCP biomass. For instance, purple non-sulfur bacteria (PNSB) growing on volatile  
275 fatty acids had a maximum protein content of 61% as dry cell weight (Peng et al., 2022),  
276 although this was measured with the modified Lowry method. Colorimetric protein assays,  
277 like the modified Lowry and Biuret methods, are not recommended for assessing the protein  
278 content in SCP production studies (Vethathirri et al., 2021) because they are susceptible to  
279 interferences that often lead to erroneous readings (Le et al., 2016). Lower protein contents of  
280 29.3% and 29.1% as dry biomass were observed in reactors F<sub>6-7</sub> and IF<sub>6-7</sub>, respectively,  
281 (Figure S2) towards the end of the study due to the usage of wastewater with a higher  
282 sCOD:sTKN and lower sTKN content until d29, despite the shift to a wastewater feed with a  
283 higher sTKN content afterwards (Table 2). Additionally, none of the reactors had a constant  
284 protein fraction during the bioconversion period, including reactor F<sub>3</sub> which was fed with the  
285 same wastewater batch throughout the study. Our data showed that the highest protein  
286 fraction (~ 50%) was achieved during 15 to 25 days.

### 287 *3.3 Microbial community-based protein meets amino acid requirement for aquaculture feed*

288           The SCP produced using several batches of soybean wastewaters either completely or  
289 partially met the demand of essential amino acids (EAA) in the aquaculture diet of trout  
290 (Ogino, 1980) and shrimp (Tacon et al., 2002) (Figure 3). Ten amino acids are regarded  
291 essential, because they are not produced by these aquaculture animals and thus need to be  
292 supplemented as part of their diet (Millamena, 2002). Microbial biomass produced in the six

293 bioreactors had an EAA content of  $38.8 \pm 2.0\%$  in protein and featured all EAAs, except for  
294 tryptophan which was not measured. Among them, leucine was found to be the most enriched  
295 in all bioreactors ( $9.2 \pm 0.6\%$  of protein). Leucine is a valuable branched chain amino acid  
296 supporting the growth, maintenance, metabolic, and physiological needs of fish (Ahmad et  
297 al., 2021). The dry biomass produced using seven distinct batches of soybean wastewaters  
298 was also rich in aspartic acid, glutamic acid, and alanine (Figure S3 and Figure S4). The same  
299 amino acids were also dominant in the existent microbial community (measured as dry cell  
300 mass) in soybean-processing wastewater (Figure S5). SCP produced from industrial  
301 wastewaters was reported to be suitable for replacing, at least partially, conventional fish  
302 meal (Hülßen et al., 2018b; Muys et al., 2020). When SCP produced from purple bacteria was  
303 used as shrimp feed, the animals exhibited higher tolerance of *Vibrio* pathogens and  
304 resistance to ammonia stress compared to a control group fed on conventional fish meal  
305 (Alloul et al., 2021b). Further, palatability of the microbial community-based SCP can be  
306 promoted by adding attractants or feed stimulants like betaine and free amino acids (Ajiboye  
307 et al., 2012) or by using feed additives like onion powder (Anwer et al., 2018). Hence, SCP  
308 produced by the growth of microbial communities can potentially be used as a protein source  
309 in the feed of aquaculture animals.

### 310 *3.4 Impact of inoculum on microbial community-based SCP production*

311 Microbial community-based synthesis of single cell protein from wastewaters has  
312 generally involved inoculation with a seed culture derived from previous experiments  
313 (Hülßen et al., 2018a; Hülßen et al., 2018b; Hülßen et al., 2020). In the present study, two out  
314 of six bioreactors received 1.5 L of a mixed microbial community that grew in a prior SCP  
315 experiment using the same source of soybean-processing wastewater. sCOD removal  
316 efficiencies ( $R_{sCOD}$ ) in these reactors, IF<sub>4-5</sub> ( $R_{sCOD} = 93\%$ ) and IF<sub>6-7</sub> ( $R_{sCOD} = 93\%$ ), were like  
317 those in their corresponding reactors, F<sub>4-5</sub> ( $R_{sCOD} = 94\%$ ) and F<sub>6-7</sub> ( $R_{sCOD} = 93\%$ ),

318 respectively, which were operated without inoculum but received the same batches of  
319 soybean processing wastewater (Table 2). In contrast, the sTN removal efficiency ( $R_{sTN}$ ) of  
320 only one reactor, IF<sub>4-5</sub> ( $R_{sTN} = 74\%$ ), was comparable to that of its counterpart reactor, F<sub>4-5</sub>  
321 ( $R_{sTN} = 75\%$ ), whereas the sTN removal efficiency ( $R_{sTN}$ ) of the other reactor, IF<sub>6-7</sub> ( $R_{sTN} =$   
322  $88\%$ ) was higher than that in its counterpart reactor, F<sub>6-7</sub> ( $R_{sTN} = 59\%$ ). We attribute this  
323 difference to the high-quality wastewater (sTKN = 80 mg/L) used to feed reactors F<sub>6-7</sub> and  
324 IF<sub>6-7</sub> from d29 to d34. Hence, inoculated reactors exhibited a higher nitrogen removal  
325 efficiency when the feed was high in sTKN and had a low sCOD:sTKN. Further, the impact  
326 of a seed inoculum on cell growth and protein synthesis can be explained by performance  
327 metrics such as yield and production rate (Table 2). Thus, a starting inoculum enriched from  
328 an existent community in the food-processing wastewater can provide microbial populations  
329 able to grow using the carbon sources and nutrients present, thus enhancing the rate of mixed-  
330 community SCP production.

### 331 *3.5 Distinct microbial communities enriched from wastewater batches of variable quality*

332 The most enriched SCP genera in reactors included *Azospirillum*, *Rhodobacter*,  
333 *Lactococcus*, and *Novosphingobium* (Figure 4). Except for *Lactococcus*, the other three main  
334 genera belonged to the phylum *Proteobacteria*, which is the predominant phylum reported in  
335 microbial community-based SCP production systems (Vethathirri et al., 2021). Although  
336 *Firmicutes* was the most prevalent phylum in the soybean processing wastewaters,  
337 *Proteobacteria* became dominant in the enriched microbial biomass in the reactors.  
338 Therefore, the massive immigration of bacteria present in the influent did not determine the  
339 structure of the microbial community in the reactors, contrary to what has been reported for  
340 full-scale activated sludge plants (Dottorini et al., 2021). A similar observation was made in a  
341 full-scale membrane bioreactor plant where the influent bacterial populations contributed  
342 little to relative abundances of the core activated sludge community (Zhang & Meng, 2021).

343 The observed shift in the microbial community composition in our study was likely due to  
344 selection conditions imposed by the available nutrients in the soybean-processing  
345 wastewaters and the operational conditions in the reactors (Santillan et al., 2020a; Santillan et  
346 al., 2019b; Seshan et al., 2021). Further, the reactors that operated without a starting  
347 inoculum (F<sub>1-2</sub>, F<sub>3</sub>, F<sub>4-5</sub>, F<sub>6-7</sub>), and received different batches of soybean processing  
348 wastewaters as feed, differed in the three most abundant bacterial genera after 34 days  
349 (Figure 4), despite having a similar initial community dominated by *Lactococcus* and  
350 *Weissella*. This highlights the effect of variable chemical characteristics of the influent  
351 wastewaters on the selection of core SCP communities in the bioreactors. Similarly, the two  
352 reactors that received the same sludge inoculum (IF<sub>4-5</sub>, IF<sub>6-7</sub>) with high relative abundances of  
353 the genera *Azospirillum* and *Lactococcus*, had enriched different bacterial genera after 34  
354 days. These two reactors were fed different batches of soybean-processing wastewaters,  
355 which had a different chemical composition (Table 1). The two main genera in the reactors  
356 on d34 were *Rhodobacter* and *Ignavibacterium* and *Novosphingobium* and *Zoogloea*,  
357 respectively, also differing from the main genera in the influent wastewaters. Likewise,  
358 *Lactococcus*, which was the predominant genus in influent wastewaters, was not among the  
359 core SCP microbial communities except for two reactors (F<sub>1-2</sub> and F<sub>6-7</sub>) that were fed with  
360 different wastewater batches. Similarly, *Weissella*, which was the second most abundant  
361 bacterial genus in the soybean wastewaters, was not enriched in any of the reactors. Taken  
362 together, these data suggest that organisms present in the influent wastewaters at low relative  
363 abundances (which may be below the limit of detection) can be enriched if provided  
364 appropriate selective conditions.

### 365 *3.6 Enriched taxa with potential applications other than SCP production*

366 Microbial community-based SCP production using food processing wastewaters may  
367 also lead to the enrichment of taxa that can produce valuable compounds or have further

368 applications in addition to microbial protein production (Vethathirri et al., 2021). Following  
369 the shift from high (110 mg/L) to low (31 mg/L) sTKN in reactor F<sub>1-2</sub>, the relative abundance  
370 of *Azospirillum* increased from 2.0% to 53.6%. Their dominance could be due to low oxygen  
371 and nitrogen levels, which favor the growth of diazotrophs (Lee et al., 2015). FISH imaging  
372 further confirmed the presence of rod-shaped *Azospirillum* cells in the SCP community  
373 (Figure 5). Some taxa within the *Azospirillum* genus can both fix nitrogen (Fukami et al.,  
374 2018) and promote plant growth by synthesizing phytohormones and other valuable  
375 compounds that improve root growth and uptake of nutrients. A similar enrichment of  
376 *Azospirillum* to that of reactor F<sub>1-2</sub> was observed in reactor F<sub>4-5</sub>, which was also started  
377 without inoculum and was fed with two wastewater batches of low sTKN content.  
378 *Azospirillum* was further identified as the most abundant bacterial genus in reactor F<sub>3</sub>, despite  
379 it having received wastewater with a high sTKN level of 110 mg/L throughout the 34-d  
380 experiment. This could have been due to the higher TSS level of 1160 mg/L from day 18  
381 onwards in F<sub>3</sub> compared to the other reactors, which translated into higher biomass  
382 production and use of available nitrogen. Reactor IF<sub>4-5</sub> received a seed inoculum in the  
383 beginning and favored *Azospirillum* until d28, but its relative abundance decreased drastically  
384 from 66% to 0.2% after the change to a different wastewater batch of higher quality. The  
385 latter helped in the enrichment of the other two genera, *Rhodobacter* and  
386 *Acidipropionibacterium*, in reactor IF<sub>4-5</sub> from d28 to d34. The different enrichment patterns  
387 of *Azospirillum* in the six reactors emphasize the impact of chemical variability of  
388 wastewaters from the same food processing industry on microbial composition of microbial  
389 community-derived SCP. Further, nitrogen-fixing bacteria like *Azospirillum* could help in the  
390 SCP production from nitrogen-limited wastewaters, with the added value of a low dissolved  
391 oxygen requirement.



392           *Acidipropionibacterium* was among the three most enriched genera in reactors F<sub>3</sub> and  
393 IF<sub>4-5</sub>. Previously named *Propionibacterium*, taxa within this genus have a wide range of  
394 applications in the food and pharmaceutical industries due to their ability to produce vitamin  
395 B12, trehalose, and bacteriocins via cell growth and synthesis of organic acids (Piwowarek et  
396 al., 2018). Some species within this genus, including *Acidipropionibacterium acidipropionici*  
397 (present in the reactors), play a major role in the food industry as either bio-preservatives or  
398 potential probiotics because of their generally recognized as safe (GRAS) status (Deptula et  
399 al., 2019). The genus *Novosphingobium* that was prevalent in reactor IF<sub>6-7</sub> includes emerging  
400 diazotrophic strains capable of promoting rice cultivation in the absence of a nitrogen source  
401 (Rangjaroen et al., 2017). *Novosphingobium nitrogenifigens* and *Novosphingobium*  
402 *sedimicola*, which were both identified at the species level in the reactor, have been shown  
403 to accumulate polyhydroxyalkanoates when growing on nitrogen deficient pulp and paper-  
404 mill effluent (Addison et al., 2007), and to achieve high N levels facilitating the growth of the  
405 sugarcane plant in N-free sands (Muangthong et al., 2015), respectively. Another abundant  
406 organism from the same reactor, *Zooglea resiniphila*, has been found to enhance the removal  
407 of major resin acid toxicants in pulp and paper-mill effluents after bioaugmentation (Yu &  
408 Mohn, 2002). The most enriched species in reactor IF<sub>4-5</sub>, *Rhodobacter gluconicum*, was  
409 reported to be a dominant soil microbe involved in electricity generation in plant microbial  
410 fuel cells (Maddalwar et al., 2021). *Ignavibacterium*, another abundant genus specific to this  
411 reactor, was reported to be involved in the degradation of aromatic compounds in  
412 petrochemical wastewater effluents (Wang et al., 2021).

### 413 3.7 Limitations of the study

414           The overall protein production rates attained in this study were lower than those  
415 reported in prior studies on SCP production. The highest protein production rate occurred in  
416 reactor F<sub>6-7</sub> (0.011 g SCP/L<sub>R</sub>/d) and was about 19 times lower than the rate reported for

417 photosynthetic bacteria using artificial sugar wastewater with a COD:TN of 5 (Cao et al.,  
418 2021). Similarly, the highest biomass yield, also from reactor IF<sub>6-7</sub> (0.089 g TSS/g sCOD<sub>feed</sub>),  
419 was ten times lower than that of photosynthetic nonsulfur bacteria produced using a volatile  
420 fatty acid-based medium with a COD:TN of 17 (Peng et al., 2022). These differences could  
421 be due to the use of synthetic wastewater with a controlled low C:N in those studies  
422 compared to the real food-processing wastewaters of varying C:N used here. Further, the  
423 sCOD:sTKN values of the soybean wastewaters batches used in this study (Table 2) were  
424 much higher than the recommended elemental C:N values (10 to 20) for microbial  
425 community-based SCP production (Vethathirri et al., 2021). The frequency of feeding was  
426 low, since time was required for the existent microbial communities in the wastewaters to  
427 grow before a new batch of feed was added. Additionally, a well-defined mixed-culture  
428 inoculum selected on specific substrates could have enhanced the production rate and yield.  
429 Hence it is plausible that a longer enrichment period on soybean-processing wastewaters  
430 would have resulted in a more effective inoculum.

### 431 *3.8 Future directions to enhance SCP production from food-processing wastewaters*

432 Further optimization of operational parameters to enhance SCP production and,  
433 specifically, accumulation of essential amino acids, is desirable. We observed an average of  
434 92% of sCOD and 73% of sTN removal (Table 2). The current feeding scheme was chosen to  
435 provide adequate time for building microbial biomass from soybean processing wastewater in  
436 SBRs. Future experiments starting with a previously enriched sludge inoculum may employ a  
437 more frequent feeding regime to increase the supply of carbon and nitrogen for cell protein  
438 synthesis. A similar strategy increased the production rate of intracellular  
439 polyhydroxyalkanoates tenfold, using volatile fatty acids as feed under aerobic conditions  
440 (Valentino et al., 2014). Additionally, microbial communities can produce other valuable  
441 compounds like vitamins and co-enzyme Q10 (Peng et al., 2022) through bioconversion of

442 nutrient-rich synthetic wastewaters. Therefore, process parameters may be tweaked to allow  
443 the production of value-added microbial products as well as single-cell protein.

#### 444 **4. Conclusions**

- 445 • Soybean-processing wastewater can be converted into SCP meeting aquaculture feed  
446 requirements through a mixed-community bioreactor bioconversion approach.
- 447 • SCP can be produced using the microbial communities already present in the food-  
448 processing wastewaters, although SCP production is higher when reactors are inoculated  
449 with a suitable mixed-community culture.
- 450 • Variable sTKN levels and sCOD:sTKN in the food-processing wastewaters result in  
451 distinct SCP microbial communities, regardless of the similar microbial composition of  
452 the influent.
- 453 • Taxa at low abundance in the wastewaters can grow into core SCP producing organisms  
454 under suitable process conditions.
- 455 • Microbial community-based bioconversion of food-processing wastewaters into SCP can  
456 enrich for taxa with the potential to promote plant growth, have probiotic effects, and  
457 produce valuable compounds like vitamins.

#### 458 **Data availability**

459 DNA sequencing data are available at NCBI BioProjects PRJNA832086. See supplementary  
460 information for details about chemical analysis, microbial protein yield and production,  
461 nutrient removal efficiency and HRT estimation, chemical characteristics of bioreactor  
462 effluent and influent, rarefaction plots for 16S rRNA gene sequencing data, biomass protein  
463 content (as % dry weight), temporal amino acid profiles in reactors, amino acid profile in dry  
464 biomass of wastewater, and temporal dynamics of the 20 most abundant genera in each  
465 reactor.

466 **Author Contributions**

467 RSV, ES and SW conceived the study. RSV and ES designed the experiment. SW obtained  
468 the funding for the study. RSV performed the experiment. RSV and SST did the laboratory  
469 chemical analyses. HYH and ES performed the molecular work. ES did the bioinformatics  
470 analyses. RSV and ES interpreted the data, generated the results, and elaborated the main  
471 arguments in the manuscript. RSV, ES and SW wrote the manuscript. All authors reviewed  
472 the manuscript.

473 **Competing interests**

474 The authors declare no competing interests.

475 **Acknowledgements**

476 This research was supported by the Singapore National Research Foundation (NRF) and  
477 Ministry of Education under the Research Centre of Excellence Program, and the NRF  
478 Competitive Research Programme (NRF-CRP21-2018-0006) "Recovery and microbial  
479 synthesis of high-value aquaculture feed additives from food-processing wastewater". DI  
480 Drautz-Moses provided support for the 16S rRNA gene amplicon library preparation and  
481 sequencing pipelines employed.

482 **References**

- 483 1. Addison, S.L., Foote, S.M., Reid, N.M., Lloyd-Jones, G. 2007. *Novosphingobium*  
484 *nitrogenifigens* sp. nov., a polyhydroxyalkanoate-accumulating diazotroph isolated  
485 from a New Zealand pulp and paper wastewater. *International Journal of Systematic*  
486 *and Evolutionary Microbiology*, **57**(Pt 11), 2467-2471.
- 487 2. Ahmad, I., Ahmed, I., Dar, N.A. 2021. Effects of dietary leucine levels on growth  
488 performance, hematobiochemical parameters, liver profile, intestinal enzyme

- 489 activities and target of rapamycin signalling pathway related gene expression in  
490 rainbow trout, *Oncorhynchus mykiss* fingerlings. *Aquaculture Nutrition*.
- 491 3. Ajiboye, O.O., Yakubu, A.F., Adams, T.E. 2012. A perspective on the ingestion and  
492 nutritional effects of feed additives in farmed fish species. *World Journal of Fish and*  
493 *Marine Sciences*, **4**(1), 87-101.
- 494 4. Alloul, A., Muys, M., Hertoghs, N., Kerckhof, F.M., Vlaeminck, S.E. 2021a.  
495 Cocultivating aerobic heterotrophs and purple bacteria for microbial protein in  
496 sequential photo- and chemotrophic reactors. *Bioresource Technology*, **319**, 124192.
- 497 5. Alloul, A., Wille, M., Lucenti, P., Bossier, P., Van Stappen, G., Vlaeminck, S.E.  
498 2021b. Purple bacteria as added-value protein ingredient in shrimp feed: *Penaeus*  
499 *vannamei* growth performance, and tolerance against *Vibrio* and ammonia stress.  
500 *Aquaculture*, **530**.
- 501 6. Anwer, I., Hafeez-ur-Rehman, M., Abbas, F., Javid, A., Hussain, A., Khan, N.,  
502 Azmat, H. 2018. Effect of onion powder as feed additive on the growth, hematology  
503 and biochemical profile of Grass Carp (*Ctenopharyngodon idella*). *Pakistan Journal*  
504 *of Zoology*(13), 58-64.
- 505 7. Azim, M.E., Little, D.C., Bron, J.E. 2008. Microbial protein production in activated  
506 suspension tanks manipulating C:N ratio in feed and the implications for fish culture.  
507 *Bioresource Technology*, **99**(9), 3590-3599.
- 508 8. Callahan, B.J., McMurdie, P.J., Holmes, S.P. 2017. Exact sequence variants should  
509 replace operational taxonomic units in marker-gene data analysis. *The ISME Journal*,  
510 **11**(12), 2639-2643.
- 511 9. Callahan, B.J., McMurdie, P.J., Rosen, M.J., Han, A.W., Johnson, A.J., Holmes, S.P.  
512 2016. DADA2: High-resolution sample inference from Illumina amplicon data.  
513 *Nature Methods*, **13**(7), 581-3.

- 514 10. Cao, K., Zhi, R., Li, Q., Zhang, G., Wang, H. 2021. Photosynthetic bacterial protein  
515 production from wastewater: Effects of C/N and light-oxygen condition. *Journal of*  
516 *Water Process Engineering*, **44**, 102361.
- 517 11. Chen, S., Dong, B., Dai, X., Wang, H., Li, N., Yang, D. 2019. Effects of thermal  
518 hydrolysis on the metabolism of amino acids in sewage sludge in anaerobic digestion.  
519 *Waste Management*, **88**, 309-318.
- 520 12. Daims, H., Brühl, A., Amann, R., Schleifer, K.-H., Wagner, M. 1999. The domain-  
521 specific probe EUB338 is insufficient for the detection of all bacteria: development  
522 and evaluation of a more comprehensive probe set. *Systematic and Applied*  
523 *Microbiology*, **22**(3), 434-444.
- 524 13. Deptula, P., Loivamaa, I., Smolander, O.-P., Laine, P., Roberts, R.J., Piironen, V.,  
525 Paulin, L., Savijoki, K., Auvinen, P., Varmanen, P. 2019. Red-brown pigmentation of  
526 *Acidipropionibacterium jensenii* Is tied to haemolytic activity and cyl-Like gene  
527 cluster. *Microorganisms*, **7**(11), 512.
- 528 14. Dottorini, G., Michaelsen, T.Y., Kucheryavskiy, S., Andersen, K.S., Kristensen, J.M.,  
529 Peces, M., Wagner, D.S., Nierychlo, M., Nielsen, P.H. 2021. Mass-immigration  
530 determines the assembly of activated sludge microbial communities. *Proceedings of*  
531 *the National Academy of Sciences*, **118**(27).
- 532 15. Durkin, A., Guo, M., Wuertz, S., Stuckey, D.C. 2022. Resource recovery from food-  
533 processing wastewaters in a circular economy: a methodology for the future. *Current*  
534 *Opinion in Biotechnology*, **76**, 102735.
- 535 16. FAO. 2003. Food energy - methods of analysis and conversion factors.
- 536 17. Fernandez-Bravo, A., Figueras, M.J. 2020. An update on the genus *Aeromonas*:  
537 Taxonomy, epidemiology, and pathogenicity. *Microorganisms*, **8**(1).

- 538 18. Fukami, J., Cerezini, P., Hungria, M. 2018. *Azospirillum*: benefits that go far beyond  
539 biological nitrogen fixation. *Amb Express*, **8**(1), 1-12.
- 540 19. Glockner, F.O., Yilmaz, P., Quast, C., Gerken, J., Beccati, A., Ciuprina, A., Bruns,  
541 G., Yarza, P., Peplies, J., Westram, R., Ludwig, W. 2017. 25 years of serving the  
542 community with ribosomal RNA gene reference databases and tools. *Journal of*  
543 *Biotechnology*, **261**, 169-176.
- 544 20. Hemme, D., Foucaud-Scheunemann, C. 2004. *Leuconostoc*, characteristics, use in  
545 dairy technology and prospects in functional foods. *International Dairy Journal*,  
546 **14**(6), 467-494.
- 547 21. Hülsen, T., Hsieh, K., Lu, Y., Tait, S., Batstone, D.J. 2018a. Simultaneous treatment  
548 and single cell protein production from agri-industrial wastewaters using purple  
549 phototrophic bacteria or microalgae - A comparison. *Bioresource Technology*, **254**,  
550 214-223.
- 551 22. Hülsen, T., Hsieh, K., Tait, S., Barry, E.M., Puyol, D., Batstone, D.J. 2018b. White  
552 and infrared light continuous photobioreactors for resource recovery from poultry  
553 processing wastewater - A comparison. *Water Research*, **144**, 665-676.
- 554 23. Hülsen, T., Sander, E.M., Jensen, P.D., Batstone, D.J. 2020. Application of purple  
555 phototrophic bacteria in a biofilm photobioreactor for single cell protein production:  
556 Biofilm vs suspended growth. *Water Research*, **181**, 115909.
- 557 24. Hülsen, T., Stegman, S., Batstone, D.J., Capson-Tojo, G. 2022. Naturally illuminated  
558 photobioreactors for resource recovery from piggery and chicken-processing  
559 wastewaters utilising purple phototrophic bacteria. *Water Research*, 118194.
- 560 25. Janarthanan, O.M., Laycock, B., Montano-Herrera, L., Lu, Y., Arcos-Hernandez,  
561 M.V., Werker, A., Pratt, S. 2016. Fluxes in PHA-storing microbial communities

- 562 during enrichment and biopolymer accumulation processes. *New Biotechnology*,  
563 **33**(1), 61-72.
- 564 26. Jeong, J.-J., Park, H.J., Cha, M.G., Park, E., Won, S.-M., Ganesan, R., Gupta, H.,  
565 Gebru, Y.A., Sharma, S.P., Lee, S.B. 2022. The *Lactobacillus* as a Probiotic:  
566 Focusing on Liver Diseases. *Microorganisms*, **10**(2), 288.
- 567 27. Ji, C., Liu, Z., Hao, L., Song, X., Wang, C., Liu, Y., Li, H., Li, C., Gao, Q., Liu, X.  
568 2020. Effects of *Enterobacter cloacae* HG-1 on the nitrogen-fixing community  
569 structure of wheat rhizosphere soil and on salt tolerance. *Frontiers in Plant Science*,  
570 **11**, 1094.
- 571 28. Jones, S.W., Karpol, A., Friedman, S., Maru, B.T., Tracy, B.P. 2020. Recent advances  
572 in single cell protein use as a feed ingredient in aquaculture. *Current Opinion in*  
573 *Biotechnology*, **61**, 189-197.
- 574 29. Le, C., Kunacheva, C., Stuckey, D.C. 2016. "Protein" measurement in biological  
575 wastewater treatment systems: A critical evaluation. *Environmental Science &*  
576 *Technology*, **50**(6), 3074-81.
- 577 30. Lee, J.Z., Logan, A., Terry, S., Spear, J.R. 2015. Microbial response to single-cell  
578 protein production and brewery wastewater treatment. *Microbial Biotechnology*, **8**(1),  
579 65-76.
- 580 31. Leger, D., Matassa, S., Noor, E., Shepon, A., Milo, R., Bar-Even, A. 2021.  
581 Photovoltaic-driven microbial protein production can use land and sunlight more  
582 efficiently than conventional crops. *Proceedings of the National Academy of Sciences*,  
583 **118**(26).
- 584 32. Maddalwar, S., Kumar Nayak, K., Kumar, M., Singh, L. 2021. Plant microbial fuel  
585 cell: Opportunities, challenges, and prospects. *Bioresource Technology*, **341**, 125772.



- 586 33. Millamena, O.M. 2002. The essential nutrients: Proteins and amino acids. in:  
587 *Nutrition in Tropical Aquaculture: Essentials of fish nutrition, feeds, and feeding of*  
588 *tropical aquatic species*, Aquaculture Department, Southeast Asian Fisheries  
589 Development Center, pp. 7-20.
- 590 34. Mora, D., Fortina, M., Parini, C., Ricci, G., Gatti, M., Giraffa, G., Manachini, P.  
591 2002. Genetic diversity and technological properties of *Streptococcus thermophilus*  
592 strains isolated from dairy products. *Journal of Applied Microbiology*, **93**(2), 278-287.
- 593 35. Muangthong, A., Youpensuk, S., Rerkasem, B. 2015. Isolation and characterisation of  
594 endophytic nitrogen fixing bacteria in sugarcane. *Tropical Life Sciences Research*,  
595 **26**(1), 41.
- 596 36. Muys, M., Papini, G., Spiller, M., Sakarika, M., Schwaiger, B., Lesueur, C., Vermeir,  
597 P., Vlaeminck, S.E. 2020. Dried aerobic heterotrophic bacteria from treatment of food  
598 and beverage effluents: Screening of correlations between operation parameters and  
599 microbial protein quality. *Bioresource Technology*, **307**, 123242.
- 600 37. Nayyar, D., Nawaz, T., Noore, S., Singh, A.P. 2021. Food processing wastewater  
601 treatment: Current practices and future challenges. in: *Pollution Control*  
602 *Technologies: Current Status and Future Prospects*, (Eds.) S.P. Singh, K. Rathinam,  
603 T. Gupta, A.K. Agarwal, Springer Singapore. Singapore, pp. 177-208.
- 604 38. Ogino, C. 1980. Requirements of carp and rainbow trout for essential amino acids.  
605 *Bulletin of the Japanese Society of Scientific Fisheries*, **46**(2), 171-174.
- 606 39. Owsianiak, M., Pusateri, V., Zamalloa, C., de Gussem, E., Verstraete, W., Ryberg,  
607 M., Valverde-Pérez, B. 2022. Performance of second-generation microbial protein  
608 used as aquaculture feed in relation to planetary boundaries. *Resources, Conservation*  
609 *and Recycling*, **180**.

- 610 40. Peng, L., Lou, W., Xu, Y., Yu, S., Liang, C., Alloul, A., Song, K., Vlaeminck, S.E.  
611 2022. Regulating light, oxygen and volatile fatty acids to boost the productivity of  
612 purple bacteria biomass, protein and co-enzyme Q10. *Science of the Total*  
613 *Environment*, 153489.
- 614 41. Pikaar, I., Matassa, S., Bodirsky, B.L., Weindl, I., Humpenoder, F., Rabaey, K., Boon,  
615 N., Bruschi, M., Yuan, Z., van Zanten, H., Herrero, M., Verstraete, W., Popp, A.  
616 2018. Decoupling livestock from land use through industrial feed production  
617 pathways. *Environmental Science & Technology*, **52**(13), 7351-7359.
- 618 42. Piwowarek, K., Lipinska, E., Hac-Szymanczuk, E., Kieliszek, M., Scibisz, I. 2018.  
619 *Propionibacterium* spp.-source of propionic acid, vitamin B12, and other metabolites  
620 important for the industry. *Applied Microbiology and Biotechnology*, **102**(2), 515-  
621 538.
- 622 43. Rangjaroen, C., Sungthong, R., Rerkasem, B., Teaumroong, N., Noisangiam, R.,  
623 Lumyong, S. 2017. Untapped endophytic colonization and plant growth-promoting  
624 potential of the genus *Novosphingobium* to optimize rice cultivation. *Microbes and*  
625 *Environments*, **32**(1), 84-87.
- 626 44. Santillan, E., Constancias, F., Wuertz, S. 2020a. Press disturbance alters community  
627 structure and assembly mechanisms of bacterial taxa and functional genes in  
628 mesocosm-scale bioreactors. *Msystems*, **5**(4), e00471-20.
- 629 45. Santillan, E., Phua, W.X., Constancias, F., Wuertz, S. 2020b. Sustained organic  
630 loading disturbance favors nitrite accumulation in bioreactors with variable resistance,  
631 recovery and resilience of nitrification and nitrifiers. *Scientific Reports*, **10**(1), 1-11.
- 632 46. Santillan, E., Seshan, H., Constancias, F., Drautz-Moses, D.I., Wuertz, S. 2019a.  
633 Frequency of disturbance alters diversity, function, and underlying assembly  
634 mechanisms of complex bacterial communities. *NPJ Biofilms Microbiomes*, **5**(1), 1-9.

- 635 47. Santillan, E., Seshan, H., Constancias, F., Wuertz, S. 2019b. Trait-based life-history  
636 strategies explain succession scenario for complex bacterial communities under  
637 varying disturbance. *Environmental Microbiology*, **21**(10), 3751-3764.
- 638 48. Santillan, E., Seshan, H., Wuertz, S. 2021. Press xenobiotic 3-chloroaniline  
639 disturbance favors deterministic assembly with a shift in function and structure of  
640 bacterial communities in sludge bioreactors. *ACS ES&T Water*, **1**(6), 1429-1437.
- 641 49. Santillan, E., Wuertz, S. 2022. Microbiome assembly predictably shapes diversity  
642 across a range of disturbance frequencies in experimental microcosms. *NPJ Biofilms  
643 Microbiomes*, **8**(1), 41.
- 644 50. Seshan, H., Santillan, E., Constancias, F., Chandra Segaran, U.S., Williams, R.B.H.,  
645 Wuertz, S. 2021. Metagenomics and metatranscriptomics reveal pathway of 3-  
646 chloroaniline degradation in wastewater reactors. *bioRxiv*.
- 647 51. Shori, A.B., Aljohani, G.S., Al-zahrani, A.J., Al-sulbi, O.S., Baba, A.S. 2022.  
648 Viability of probiotics and antioxidant activity of cashew milk-based yogurt  
649 fermented with selected strains of probiotic *Lactobacillus* spp. *LWT*, **153**, 112482.
- 650 52. Song, A.A., In, L.L.A., Lim, S.H.E., Rahim, R.A. 2017. A review on *Lactococcus*  
651 *lactis*: from food to factory. *Microbial Cell Factories*, **16**(1), 55.
- 652 53. Spiller, M., Muys, M., Papini, G., Sakarika, M., Buyle, M., Vlaeminck, S.E. 2020.  
653 Environmental impact of microbial protein from potato wastewater as feed ingredient:  
654 Comparative consequential life cycle assessment of three production systems and  
655 soybean meal. *Water Research*, **171**, 115406.
- 656 54. Stoffels, M., Castellanos, T., Hartmann, A. 2001. Design and application of new 16S  
657 rRNA-targeted oligonucleotide probes for the *Azospirillum-Skermanella-Rhodocista*-  
658 cluster. *Systematic and Applied Microbiology*, **24**(1), 83-97.

- 659 55. Suman, G., Nupur, M., Anuradha, S., Pradeep, B. 2015. Single cell protein  
660 production: A review. *International Journal of Current Microbiology and Applied*  
661 *Sciences*, **4**(9), 251-262.
- 662 56. Tacon, A.G.J., Cody, J.J., Conquest, L.D., Divakaran, S., Forster, I.P., Decamp, O.E.  
663 2002. Effect of culture system on the nutrition and growth performance of Pacific  
664 white shrimp *Litopenaeus vannamei* (Boone) fed different diets. *Aquaculture*  
665 *Nutrition*, **8**(2), 121-137.
- 666 57. Teixeira, C.G., Fusieger, A., Miliao, G.L., Martins, E., Drider, D., Nero, L.A., de  
667 Carvalho, A.F. 2021. *Weissella*: An emerging bacterium with promising health  
668 benefits. *Probiotics and Antimicrobial Proteins*, **13**(4), 915-925.
- 669 58. Thijs, S., Op De Beeck, M., Beckers, B., Truyens, S., Stevens, V., Van Hamme, J.D.,  
670 Weyens, N., Vangronsveld, J. 2017. Comparative evaluation of four bacteria-specific  
671 primer pairs for 16S rRNA gene surveys. *Frontiers in Microbiology*, **8**, 494.
- 672 59. Valentino, F., Beccari, M., Fraraccio, S., Zanaroli, G., Majone, M. 2014. Feed  
673 frequency in a sequencing batch reactor strongly affects the production of  
674 polyhydroxyalkanoates (PHAs) from volatile fatty acids. *New Biotechnology*, **31**(4),  
675 264-75.
- 676 60. Verstraete, W., Yanuka-Golub, K., Driesen, N., De Vrieze, J. 2022. Engineering  
677 microbial technologies for environmental sustainability: choices to make. *Microbial*  
678 *Biotechnology*, **15**(1), 215-227.
- 679 61. Vethathirri, R.S., Santillan, E., Wuertz, S. 2021. Microbial community-based protein  
680 production from wastewater for animal feed applications. *Bioresource Technology*,  
681 **341**, 125723.
- 682 62. Webster, C.D., Lim, C. 2002. *Nutrient requirements and feeding of finfish for*  
683 *aquaculture*. Cabi.

- 684           63. Yu, Z., Mohn, W.W. 2002. Bioaugmentation with the resin acid-degrading bacterium  
685           *Zoogloea resiniphila* DhA-35 to counteract pH stress in an aerated lagoon treating  
686           pulp and paper mill effluent. *Water Research*, **36**(11), 2793-2801.
- 687           64. Zhang, S., Meng, F. 2021. Core activated sludge communities are influenced little by  
688           immigration: Case study of a membrane bioreactor plant. *Journal of Environmental*  
689           *Sciences*, **102**, 244-255.

690 **Table 1** – Chemical characteristics of soybean processing wastewaters used for microbial community-based SCP production.

| Soybean wastewater batch <sup>a</sup> (quality) <sup>b</sup> | sCOD [mg/L] | sTKN <sup>c</sup> [mg/L] | sPO <sub>4</sub> <sup>3-</sup> -P [mg/L] | NH <sub>4</sub> <sup>+</sup> -N [mg/L] | NO <sub>2</sub> <sup>-</sup> -N [mg/L] | NO <sub>3</sub> <sup>-</sup> -N [mg/L] | TA <sup>d</sup> [mg/L] | TSS [mg/L] | VSS [mg/L] | pH   | C: N (sCOD: sTKN) <sup>e</sup> | N:P (sTKN: sPO <sub>4</sub> <sup>3-</sup> -P) <sup>e</sup> |
|--------------------------------------------------------------|-------------|--------------------------|------------------------------------------|----------------------------------------|----------------------------------------|----------------------------------------|------------------------|------------|------------|------|--------------------------------|------------------------------------------------------------|
| 1 (H)                                                        | 9038        | 110                      | 67                                       | 5.9                                    | 0.08                                   | 13.65                                  | 453                    | 90         | 90         | 5.90 | 82.5                           | 1.6                                                        |
| 2 (L)                                                        | 2334        | 31                       | 17                                       | 3.1                                    | 0.04                                   | 1.88                                   | 57                     | 140        | 140        | 4.80 | 74.3                           | 1.9                                                        |
| 3 (H)                                                        | 8945        | 110                      | 65                                       | 9.0                                    | 0.32                                   | 8.4                                    | 208                    | 530        | 480        | 4.80 | 81.3                           | 1.7                                                        |
| 4.1 (L)                                                      | 5670        | 50                       | 21                                       | 6.42                                   | 0.01                                   | 0.00                                   | 206                    | 210        | 210        | 5.39 | 112.0                          | 2.4                                                        |
| 4.2 (L)                                                      | 4180        | 28                       | 18                                       | 4.07                                   | 0.00                                   | 0.09                                   | 138                    | 310        | 310        | 5.28 | 147.0                          | 1.6                                                        |
| 5 (L)                                                        | 3474        | 34                       | 14                                       | 3.40                                   | 0.00                                   | 0.02                                   | 118                    | 160        | 160        | 5.04 | 101.8                          | 2.5                                                        |
| 6.1 (L)                                                      | 2494        | 13                       | 8                                        | 1.28                                   | 0.00                                   | 0.37                                   | 39                     | 150        | 150        | 4.90 | 186.9                          | 1.7                                                        |
| 6.2 (L)                                                      | 2501        | 15                       | 8                                        | 1.11                                   | 0.01                                   | 0.31                                   | 34                     | 180        | 180        | 4.85 | 166.2                          | 1.9                                                        |
| 7 (H)                                                        | 7663        | 80                       | 29                                       | 5.26                                   | 0.00                                   | 0.07                                   | 254                    | 330        | 330        | 4.70 | 96.1                           | 2.8                                                        |

691 <sup>a</sup> A total of nine 20-L carboys were collected at seven different time points over three months.

692 <sup>b</sup> High quality (H) for sTKN = 62 - 110 mg/L and low quality (L) for sTKN = 13 - 61 mg/L.

693 <sup>c</sup> sTKN was calculated using the value of sTN, nitrate and nitrite: sTKN = sTN – nitrate - nitrite.

694 <sup>d</sup> Total alkalinity expressed as calcium carbonate

695 <sup>e</sup> Ratio of carbon and nitrogen in wastewater as calculated from chemical data.

696 **Table 2** –Microbial community-based SCP production through bioconversion of soybean processing wastewaters.

| Reactor                        | Day     | Waste water batch (quality) <sup>a</sup> | sTKN [mg/L] | C: N [sCOD: sTKN] | Biomass production rate [g TSS/L <sub>R</sub> /d] <sup>b</sup> | Biomass yield_sCOD [g TSS/g sCOD] | Biomass yield_sTKN [g TSS/g sTKN] | Protein production rate [g SCP/L <sub>R</sub> /d] | Protein yield_sCOD [g SCP/g sCOD] | Protein yield_sTKN [g SCP/g sTKN] | R <sub>sCOD</sub> <sup>c</sup> [%] | R <sub>sTN</sub> <sup>c</sup> [%] |
|--------------------------------|---------|------------------------------------------|-------------|-------------------|----------------------------------------------------------------|-----------------------------------|-----------------------------------|---------------------------------------------------|-----------------------------------|-----------------------------------|------------------------------------|-----------------------------------|
| F <sub>1-2</sub>               | 1 – 23  | 1 (H)                                    | 110         | 82.5              | 0.005                                                          | 0.006                             | 0.49                              | 0.006                                             | 0.007                             | 0.53                              | 87                                 | 74                                |
|                                | 24 – 34 | 2 (L)                                    | 31          | 74.3              |                                                                |                                   |                                   |                                                   |                                   |                                   |                                    |                                   |
| F <sub>3</sub>                 | 1 – 34  | 3 (H)                                    | 110         | 81.3              | 0.042                                                          | 0.053                             | 4.28                              | 0.010                                             | 0.012                             | 1.00                              | 90                                 | 68                                |
| F <sub>4-5</sub>               | 1 – 14  | 4.1 (L)                                  | 50          | 112.0             | 0.013                                                          | 0.021                             | 2.55                              | 0.004                                             | 0.007                             | 0.82                              | 95                                 | 75                                |
|                                | 15 – 29 | 4.2 (L)                                  | 28          | 147.0             |                                                                |                                   |                                   |                                                   |                                   |                                   |                                    |                                   |
|                                | 30 – 34 | 5 (L)                                    | 34          | 101.8             |                                                                |                                   |                                   |                                                   |                                   |                                   |                                    |                                   |
| IF <sub>4-5</sub> <sup>d</sup> | 1 – 14  | 4.1 (L)                                  | 50          | 112.0             | 0.021                                                          | 0.036                             | 4.44                              | 0.006                                             | 0.011                             | 1.37                              | 93                                 | 74                                |
|                                | 15 – 29 | 4.2 (L)                                  | 28          | 147.0             |                                                                |                                   |                                   |                                                   |                                   |                                   |                                    |                                   |
|                                | 30 – 34 | 5 (L)                                    | 34          | 101.8             |                                                                |                                   |                                   |                                                   |                                   |                                   |                                    |                                   |
| F <sub>6-7</sub>               | 1 – 14  | 6.1 (L)                                  | 13          | 186.9             | 0.039                                                          | 0.083                             | 11.06                             | 0.011                                             | 0.024                             | 3.13                              | 93                                 | 59                                |
|                                | 15 – 29 | 6.2 (L)                                  | 15          | 166.2             |                                                                |                                   |                                   |                                                   |                                   |                                   |                                    |                                   |
|                                | 30 – 34 | 7 (H)                                    | 80          | 96.1              |                                                                |                                   |                                   |                                                   |                                   |                                   |                                    |                                   |
| IF <sub>6-7</sub> <sup>d</sup> | 1 – 14  | 6.1 (L)                                  | 13          | 186.9             | 0.040                                                          | 0.089                             | 11.64                             | 0.009                                             | 0.021                             | 2.76                              | 94                                 | 88                                |
|                                | 15 – 29 | 6.2 (L)                                  | 15          | 166.2             |                                                                |                                   |                                   |                                                   |                                   |                                   |                                    |                                   |
|                                | 30 – 34 | 7 (H)                                    | 80          | 96.1              |                                                                |                                   |                                   |                                                   |                                   |                                   |                                    |                                   |

697 <sup>a</sup> High quality (H) for sTKN = 62 - 110 mg/L and low quality (L) for sTKN = 13 - 61 mg/L.

698 <sup>b</sup> L<sub>R</sub> = reactor volume in liters. All reactors had a working volume of 4.5 L.

699 <sup>c</sup> Average nutrient removal efficiency calculated for each reactor based on feed and effluent characteristics (Table S1).

700 <sup>d</sup> Reactors IF<sub>4-5</sub> and IF<sub>6-7</sub> received a 1.5-L inoculum from reactor F<sub>3</sub>, while reactors F<sub>1-2</sub>, F<sub>3</sub>, F<sub>4-5</sub> and F<sub>6-7</sub> were started without inoculum.

701 Subscript numbers indicate the wastewater batch used as feed.

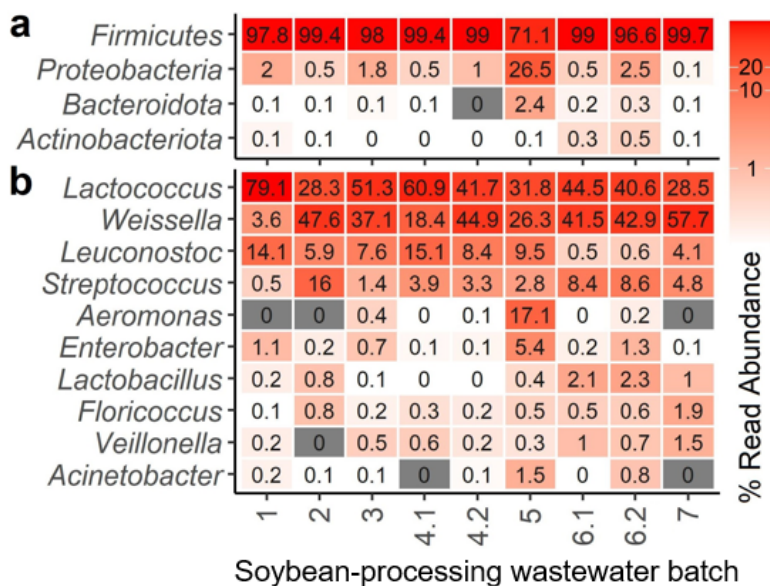

702

703 **Figure 1.** Microbial characterization of influent soybean processing wastewaters used for  
 704 microbial community-based SCP production as assessed through 16S rRNA gene amplicon  
 705 sequencing (n = 9). **(a)** Four most abundant phyla and **(b)** ten most abundant genera of nine  
 706 wastewater batches were collected at seven different time points over three months.



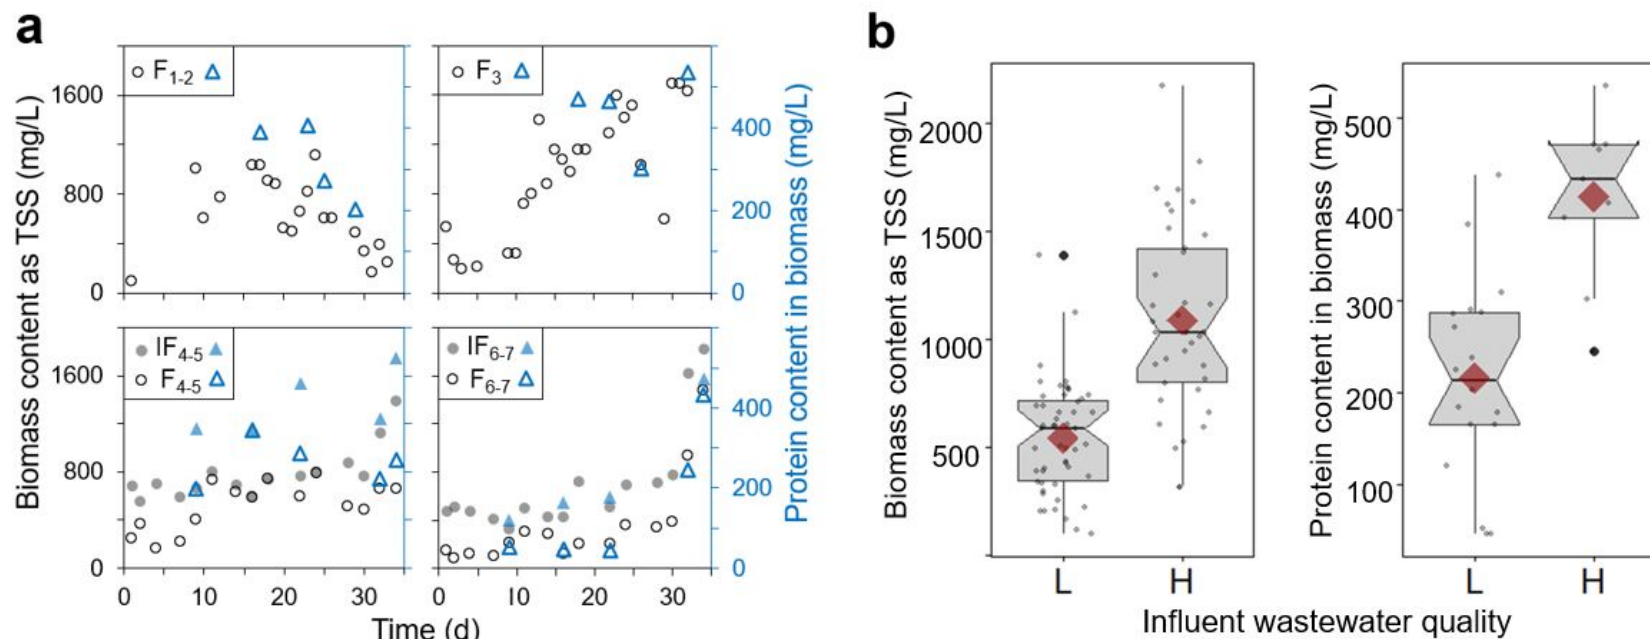

707

708 **Figure 2.** Biomass growth, biomass protein content and influent wastewater quality impact in six SCP-enriched bioreactors. (a) Biomass  
 709 measured as total suspended solids (TSS, black circles), and protein content in the biomass via amino acid quantification using HPLC (blue  
 710 triangles). Four reactors (F<sub>1-2</sub>, F<sub>3</sub>, F<sub>4-5</sub>, and F<sub>6-7</sub>) were initiated without inoculum and two (IF<sub>4-5</sub> and IF<sub>6-7</sub>) received a 1.5-L inoculum from reactor  
 711 F<sub>3</sub> (subscript numbers indicate the wastewater batch used as feed). (b) Box plots of biomass content and protein content in biomass for low (L,  
 712 sTKN = 13 - 61 mg/L) and high (H, sTKN = 62 - 110 mg/L) quality feed. Only data from day 5 onwards were included to exclude low TSS  
 713 values during the reactor start-up period. Red diamonds display mean values and notches show the 95% confidence interval for the median;  
 714 when notches do not overlap the medians can be judged to differ significantly (two-tailed Welch's t-tests,  $p < 0.0001$ ).

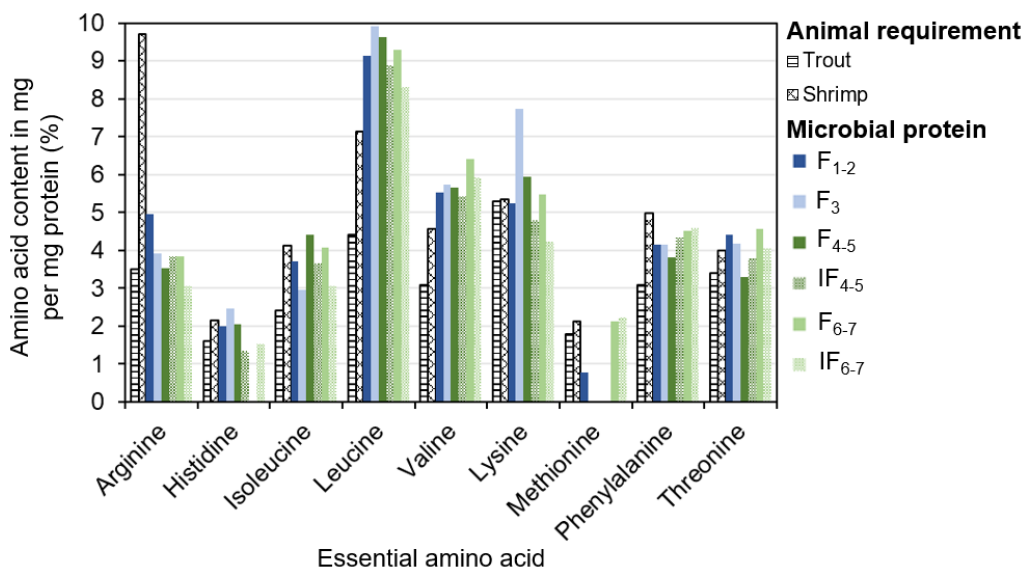

715

716 **Figure 3.** Essential amino acids in microbial community-based single cell protein produced  
717 from soybean processing wastewaters (solid/pattern-filled blue/green bars) and compared to  
718 the minimum requirements for trout and shrimp feed (pattern-filled black bars). Data  
719 available in Ogino (1980) and Tacon et al. (2002) were used to plot the minimum essential  
720 amino acid requirements of trout and shrimp, respectively. Four reactors were initiated  
721 without inoculum: F<sub>1-2</sub> (solid-filled dark blue bar), F<sub>3</sub> (solid-filled light blue bar), F<sub>4-5</sub> (solid-  
722 filled dark green bar), and F<sub>6-7</sub> (solid-filled light green bar). Two reactors received a 1.5-L  
723 inoculum from reactor F<sub>3</sub>: IF<sub>4-5</sub> (pattern-filled dark green bar) and IF<sub>6-7</sub> (pattern-filled light  
724 green bar). Subscript numbers indicate the wastewater batch used as feed. Data used for F<sub>1-2</sub>  
725 and F<sub>3</sub> correspond to samples collected on d29 and d32, respectively, while data used for the  
726 remaining reactors correspond to d34.

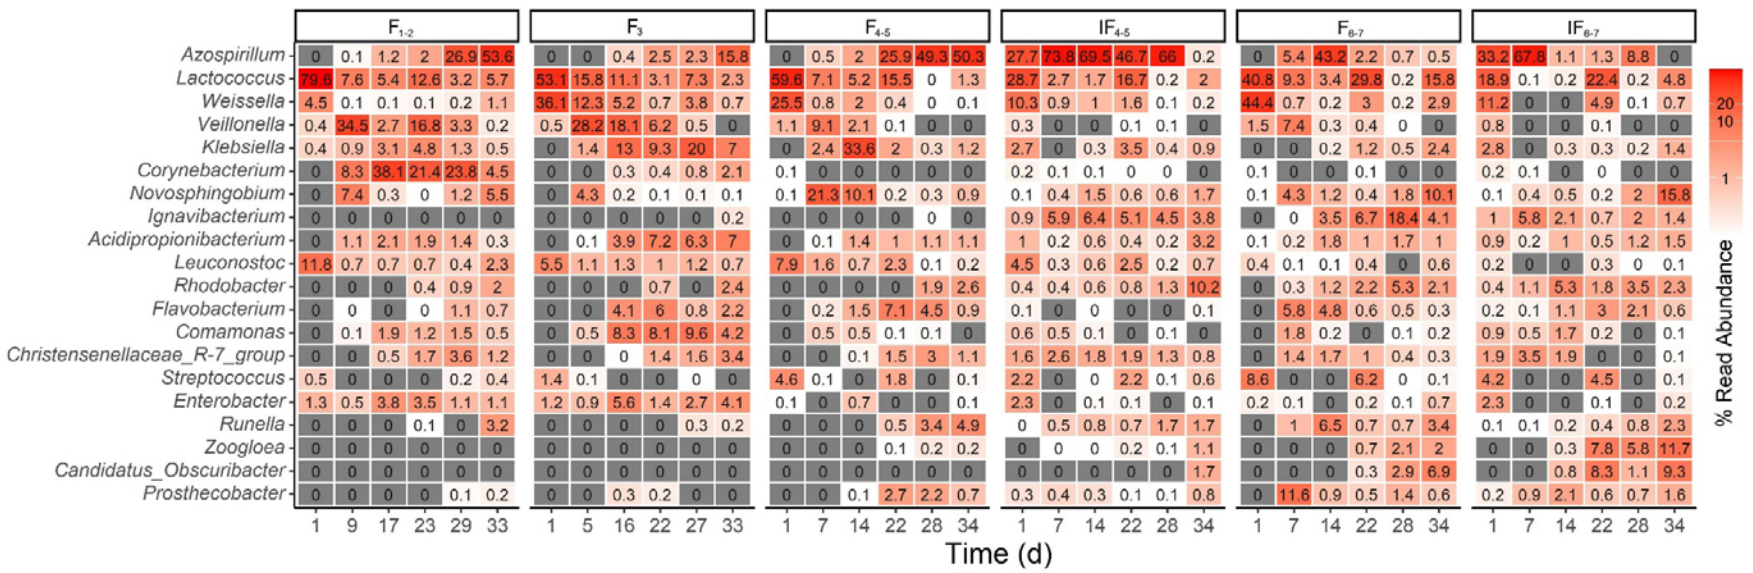

727

728 **Figure 4.** Microbial characterization based on 16S rRNA gene amplicon sequencing of community-based SCP biomass produced from soybean  
 729 processing wastewaters. The temporal dynamics of the 20 most abundant bacterial genera across all reactors are shown. Four reactors (F<sub>1-2</sub>, F<sub>3</sub>,  
 730 F<sub>4-5</sub>, and F<sub>6-7</sub>) were initiated without inoculum and two (IF<sub>4-5</sub> and IF<sub>6-7</sub>) received a 1.5-L inoculum from reactor F<sub>3</sub> (subscript numbers indicate  
 731 the wastewater batch used as feed). Heat maps were generated using 16S rRNA gene amplicon v3-v4 data; ASVs were grouped at the required  
 732 taxonomic level and ranked with the most abundant ASV on top. Additional reactor samples were analyzed for high temporal resolution (Figure  
 733 S6-S8).

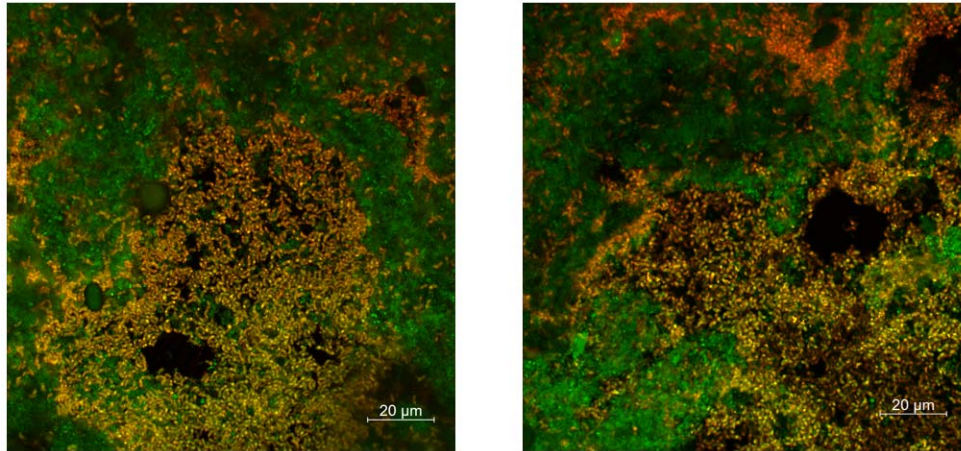

734

735 **Figure 5.** FISH images from reactor IF<sub>4.5</sub> on d18 showing *Azospirillum* (orange) and all  
736 bacterial (green) cells. Cell abundances are consistent with 16S rRNA gene amplicon  
737 sequencing data for *Azospirillum* in IF<sub>4.5</sub> on d18 indicating a relative abundance of 75.3%.  
738 Reactor IF<sub>4.5</sub> had an inoculum from prior SCP production (reactor F<sub>3</sub>) and received batches 4  
739 and 5 of soybean processing wastewater as feed. FISH images showing *Azospirillum* were  
740 also obtained from other reactors (Figure S9).
